# Supplementary material
Source: PubMed Central journal article supplement (PMC449767)

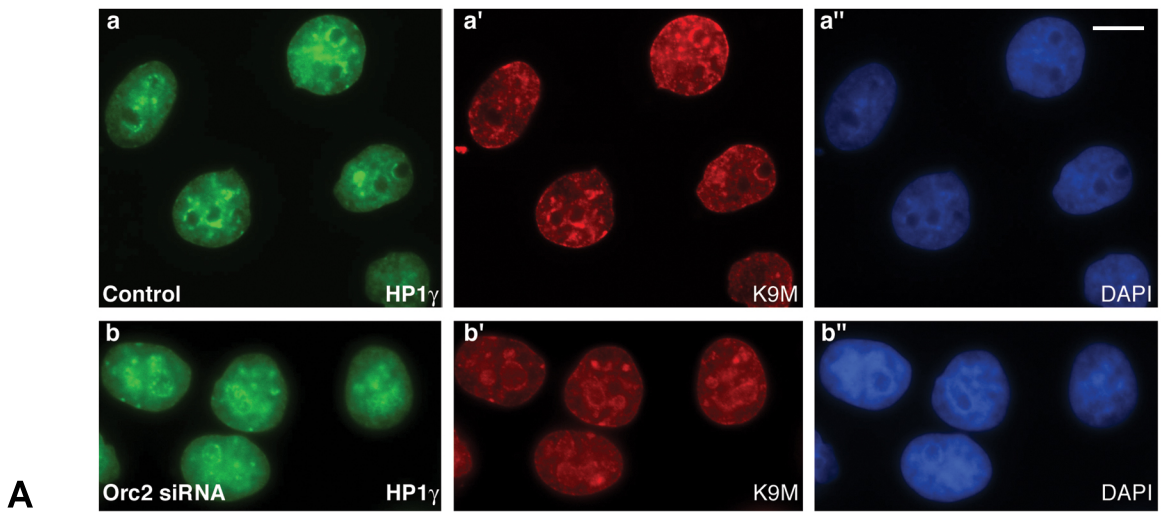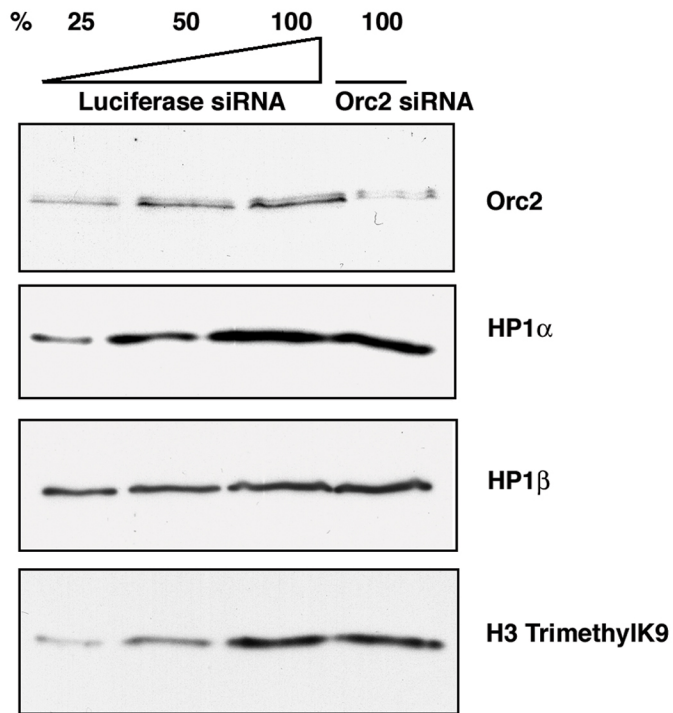

Suppl. Figure 7

Supplement: 7600255s10.pdf [file 7600255s10.pdf]

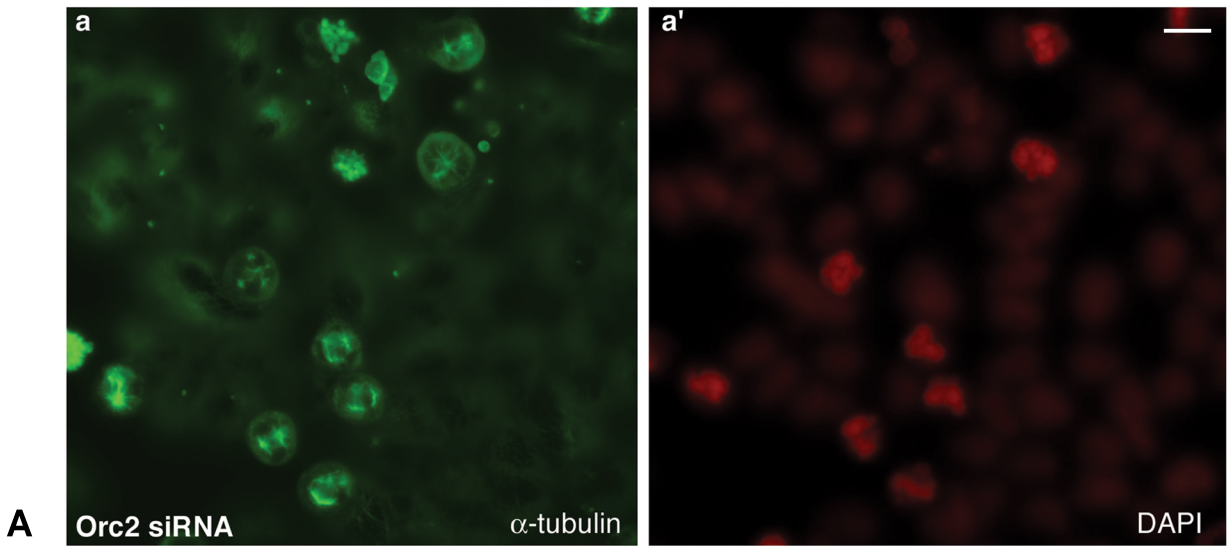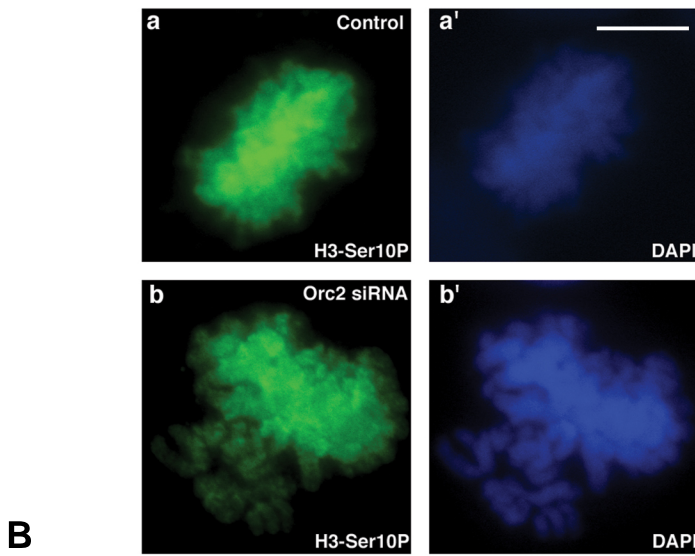

Suppl. Figure 8

Supplement: 7600255s11.pdf [file 7600255s11.pdf]

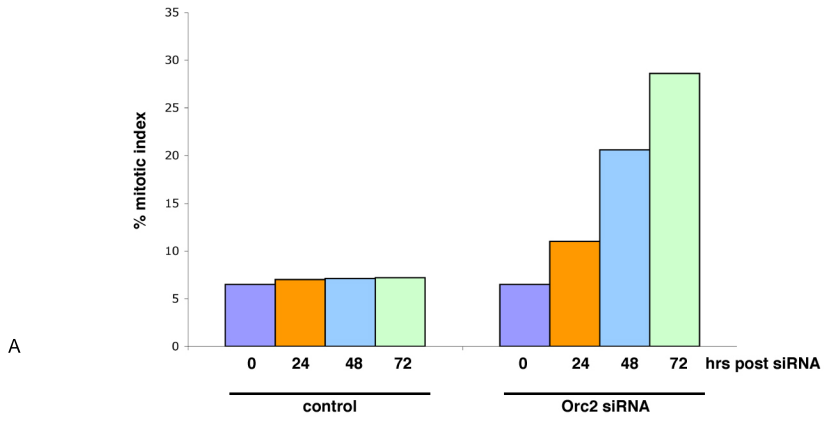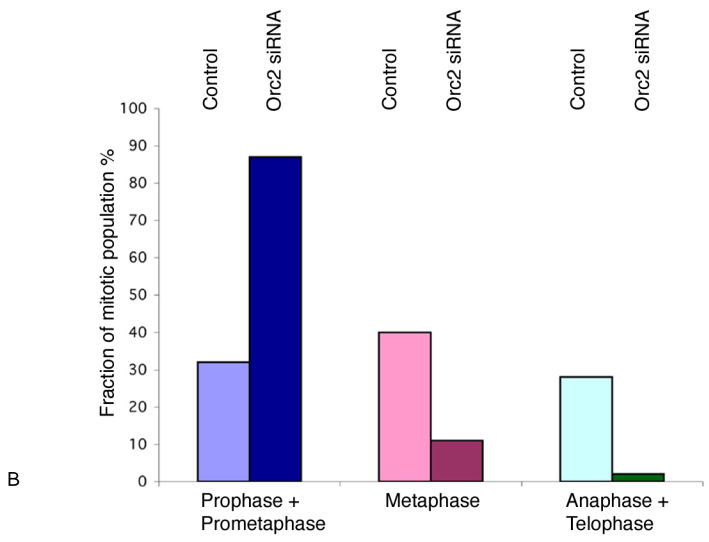

Suppl. Figure 9

Supplement: 7600255s12.pdf [file 7600255s12.pdf]

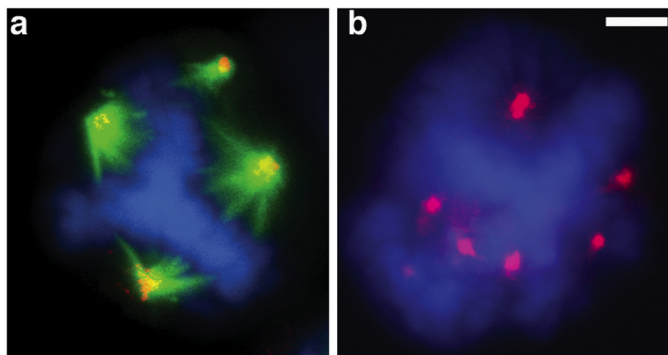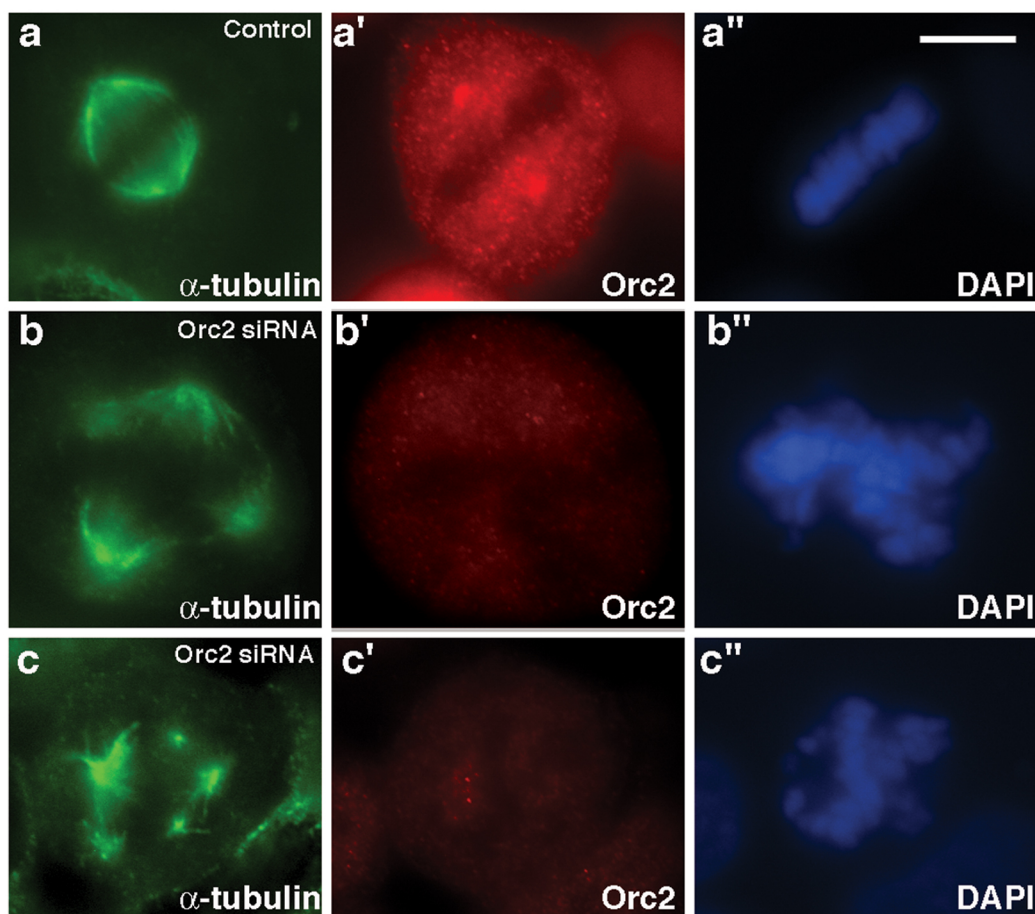

Suppl. Figure 10

Supplement: 7600255s13.pdf [file 7600255s13.pdf]

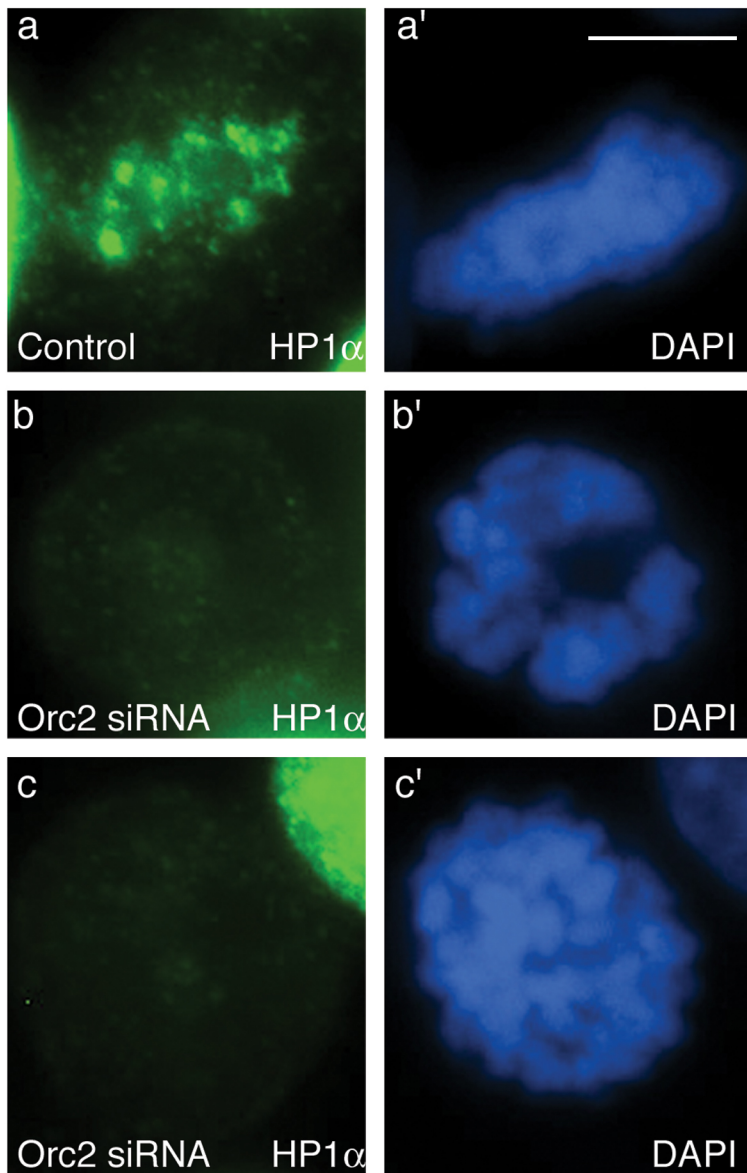

Suppl. Figure 11

Supplement: 7600255s14.pdf [file 7600255s14.pdf]

CONTROL

Orc2 siRNA

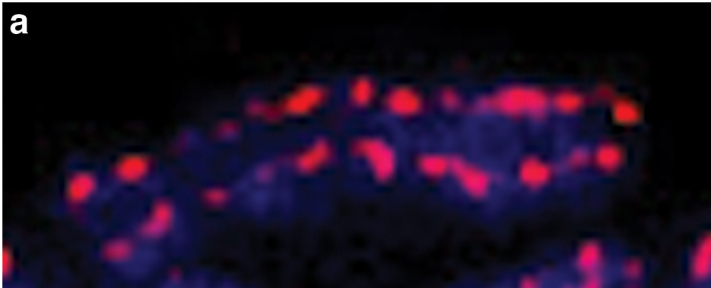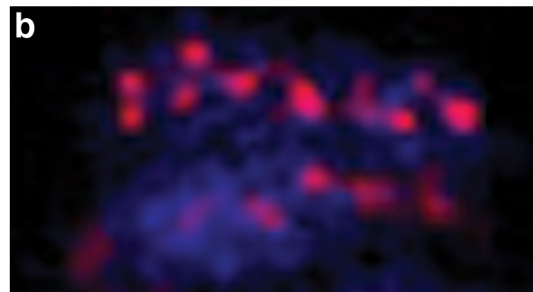

A

CONTROL

Orc2 siRNA

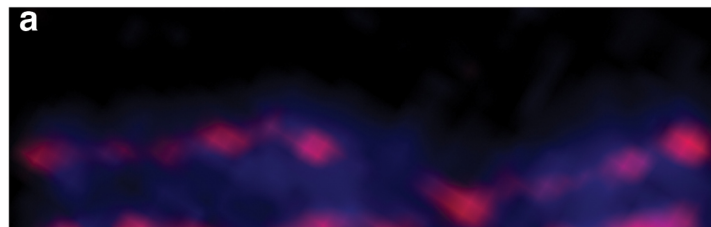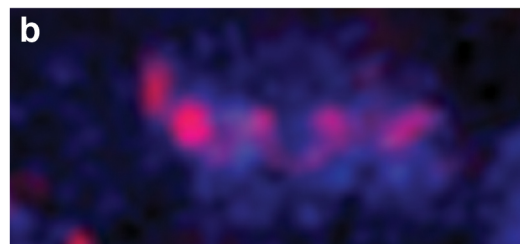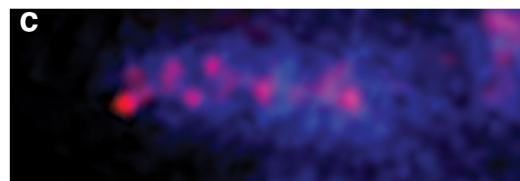

B

Suppl. Figure 12

Supplement: 7600255s15.pdf [file 7600255s15.pdf]

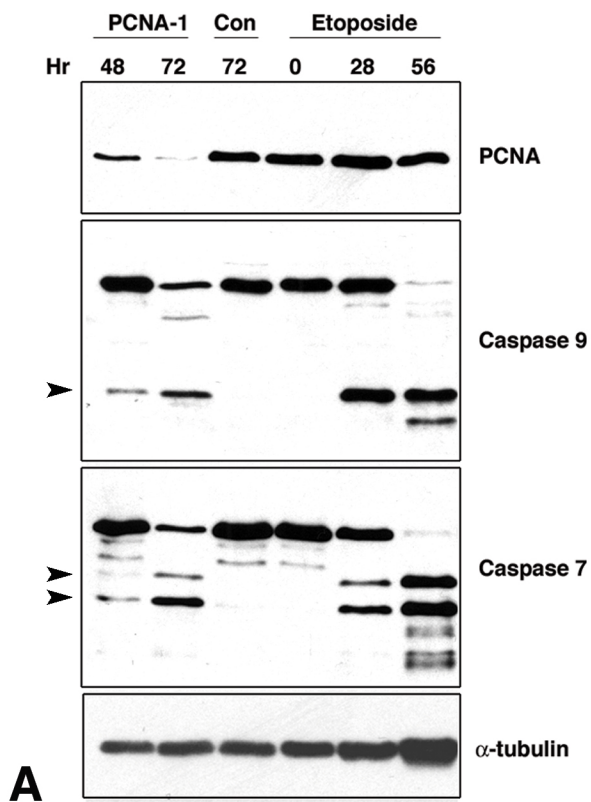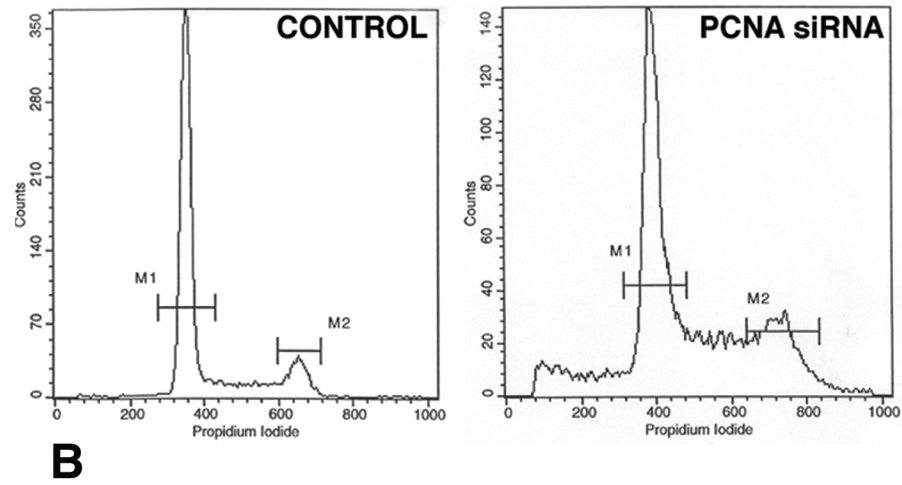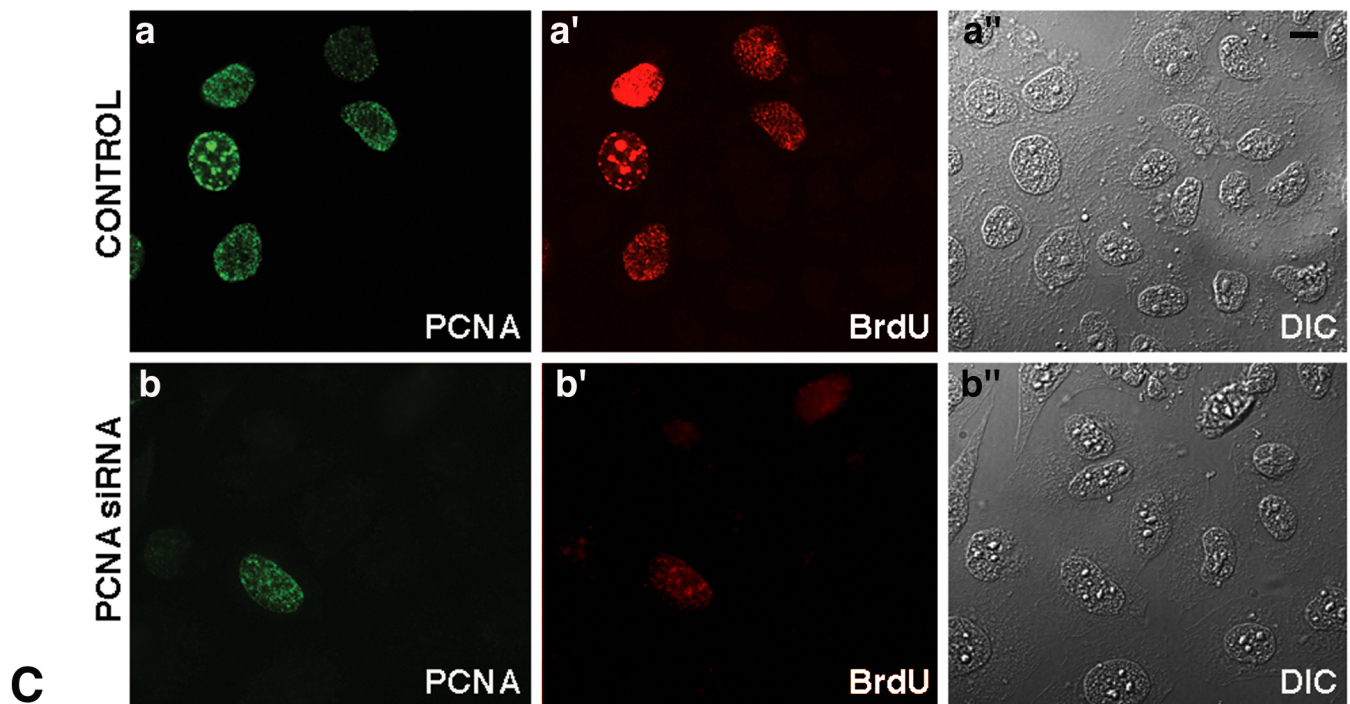

Suppl. Figure 13

Supplement: 7600255s16.pdf [file 7600255s16.pdf]

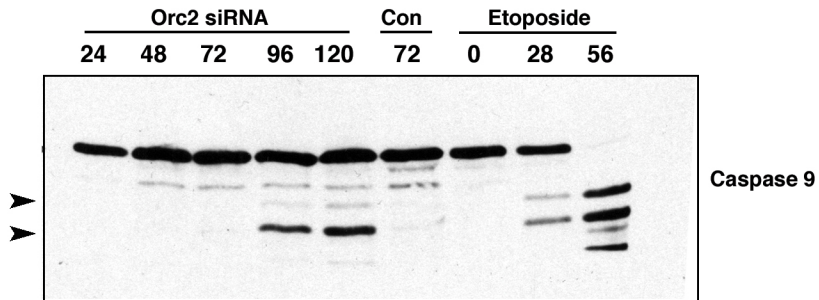

Suppl. Figure 14

Supplement: 7600255s17.pdf [file 7600255s17.pdf]

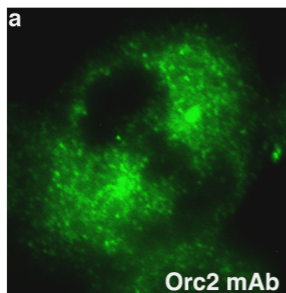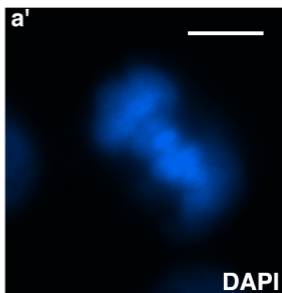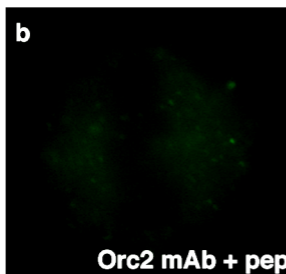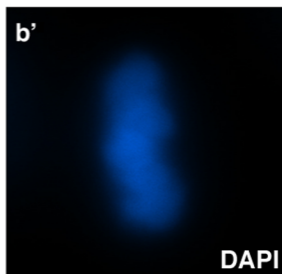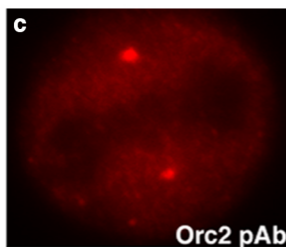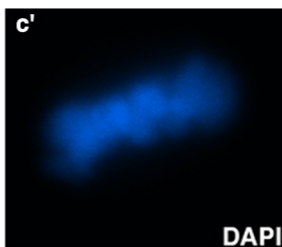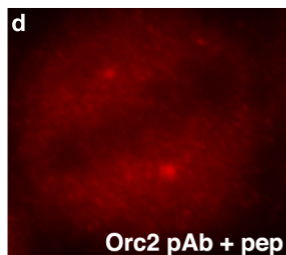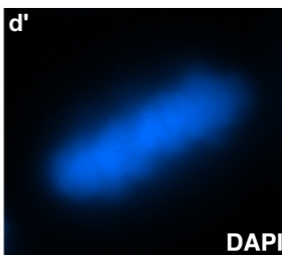

Suppl. Figure 1

Supplement: 7600255s4.pdf [file 7600255s4.pdf]

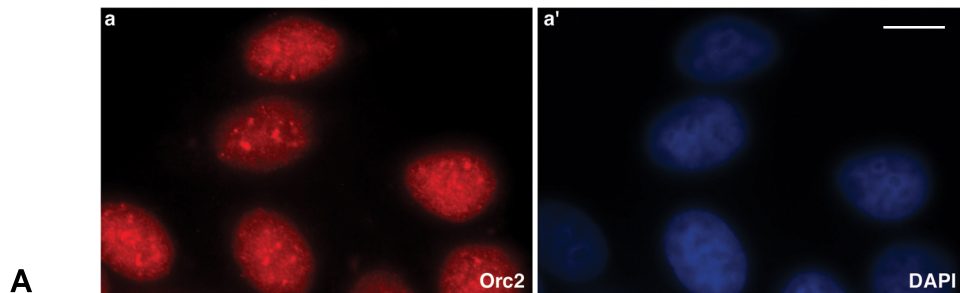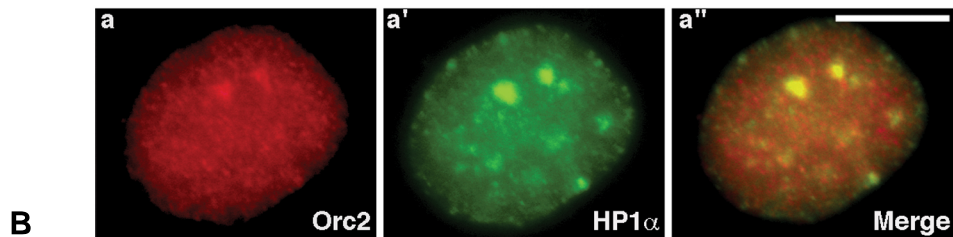

Suppl. Figure 2

Supplement: 7600255s5.pdf [file 7600255s5.pdf]

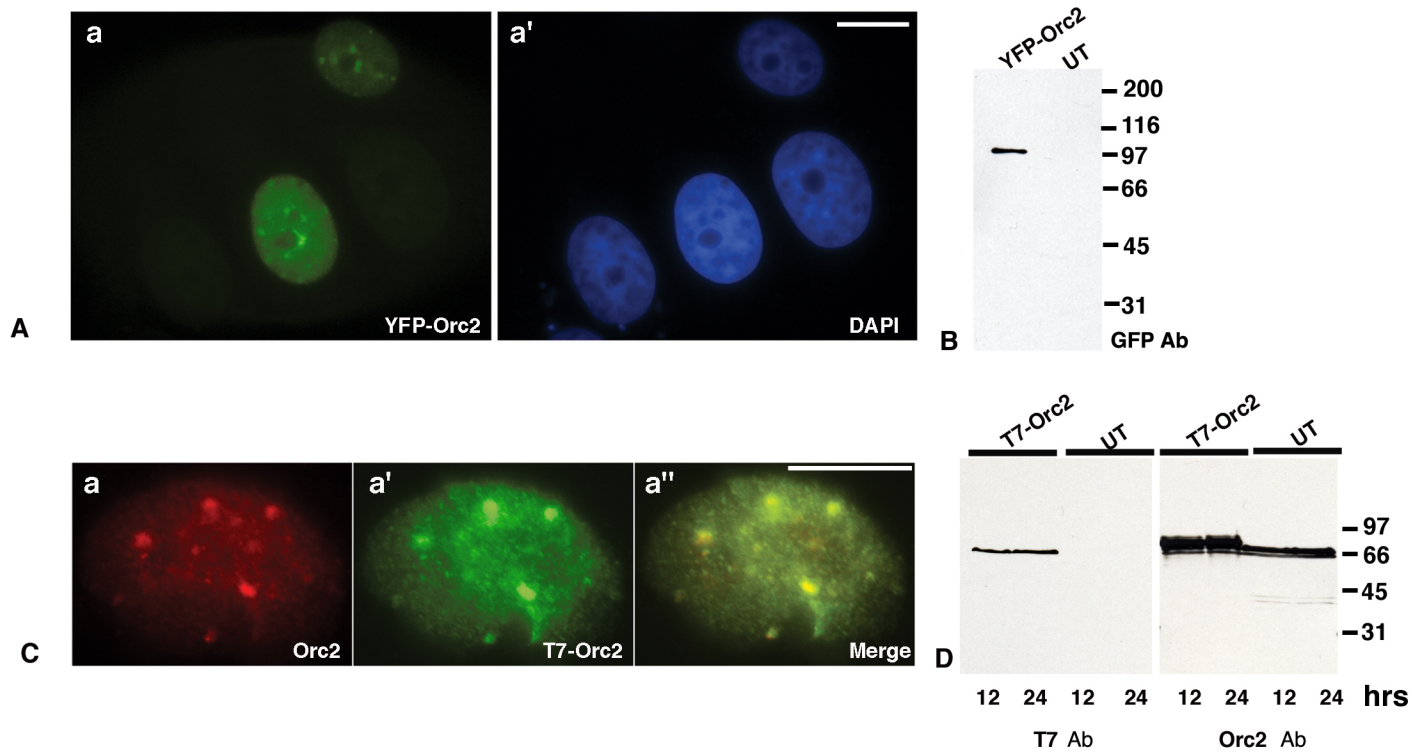

Supplement: 7600255s6.pdf [file 7600255s6.pdf]

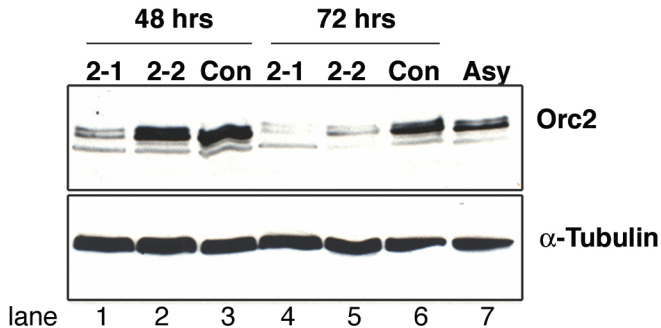

**Suppl. Figure 4**

Supplement: 7600255s7.pdf [file 7600255s7.pdf]

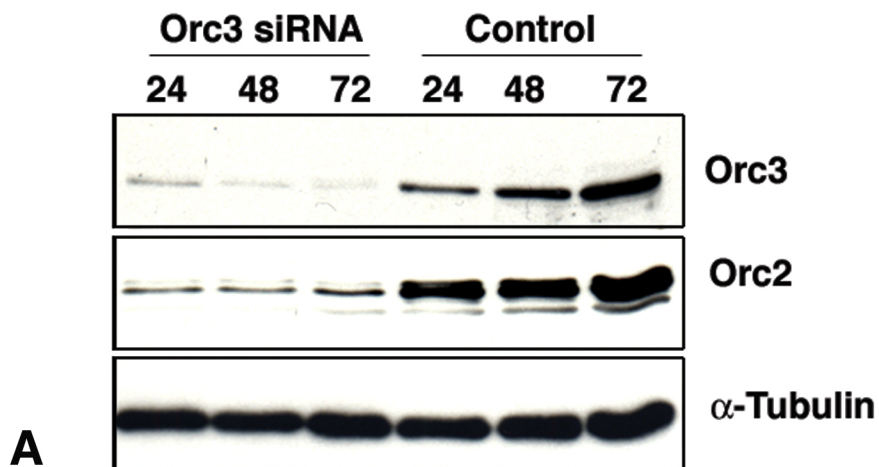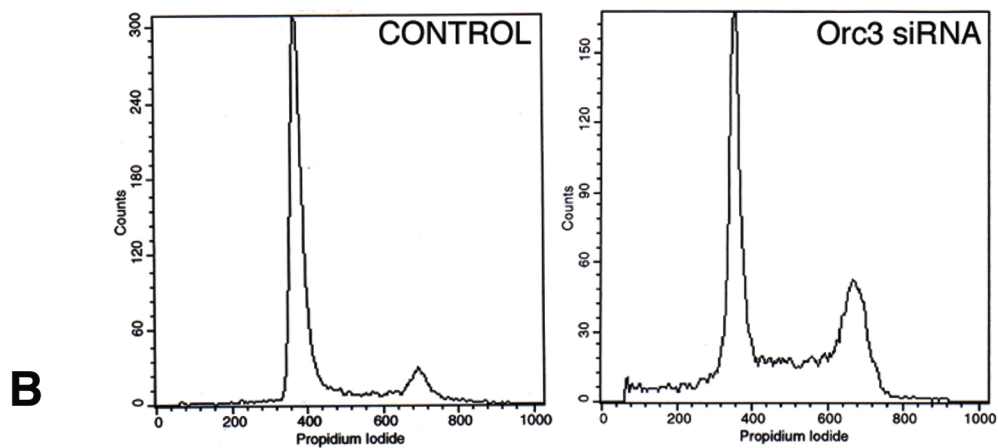

Supplement: 7600255s8.pdf [file 7600255s8.pdf]

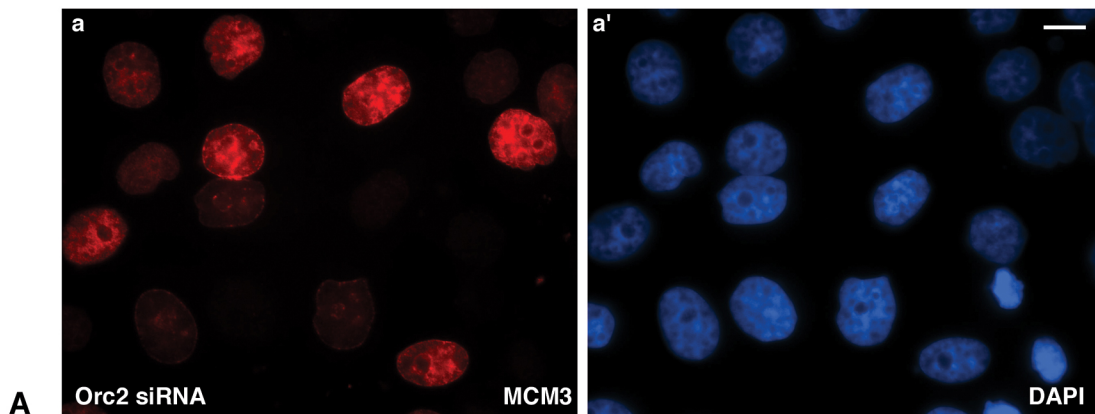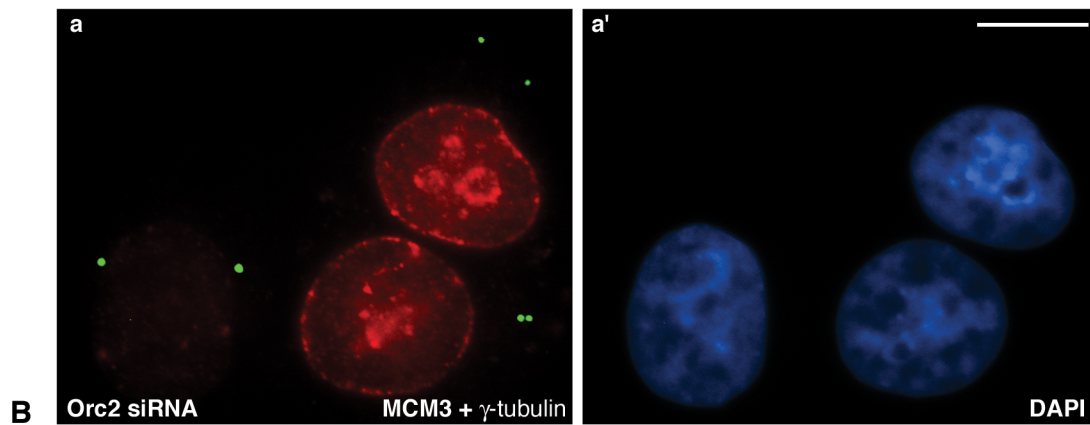

**Suppl. Figure 6**

Supplement: 7600255s9.pdf [file 7600255s9.pdf]
